# Supplementary material for: Trends of survival in patients with multiple myeloma in Japan: a multicenter retrospective collaborative study of the Japanese Society of Myeloma
Source: PubMed Central journal article supplement (PMC4648525; doi:10.1038/bcj.2015.79), 2015-09-18

# Supplementary Figure 1

**a**

**2001-2005**

**2006-2012**

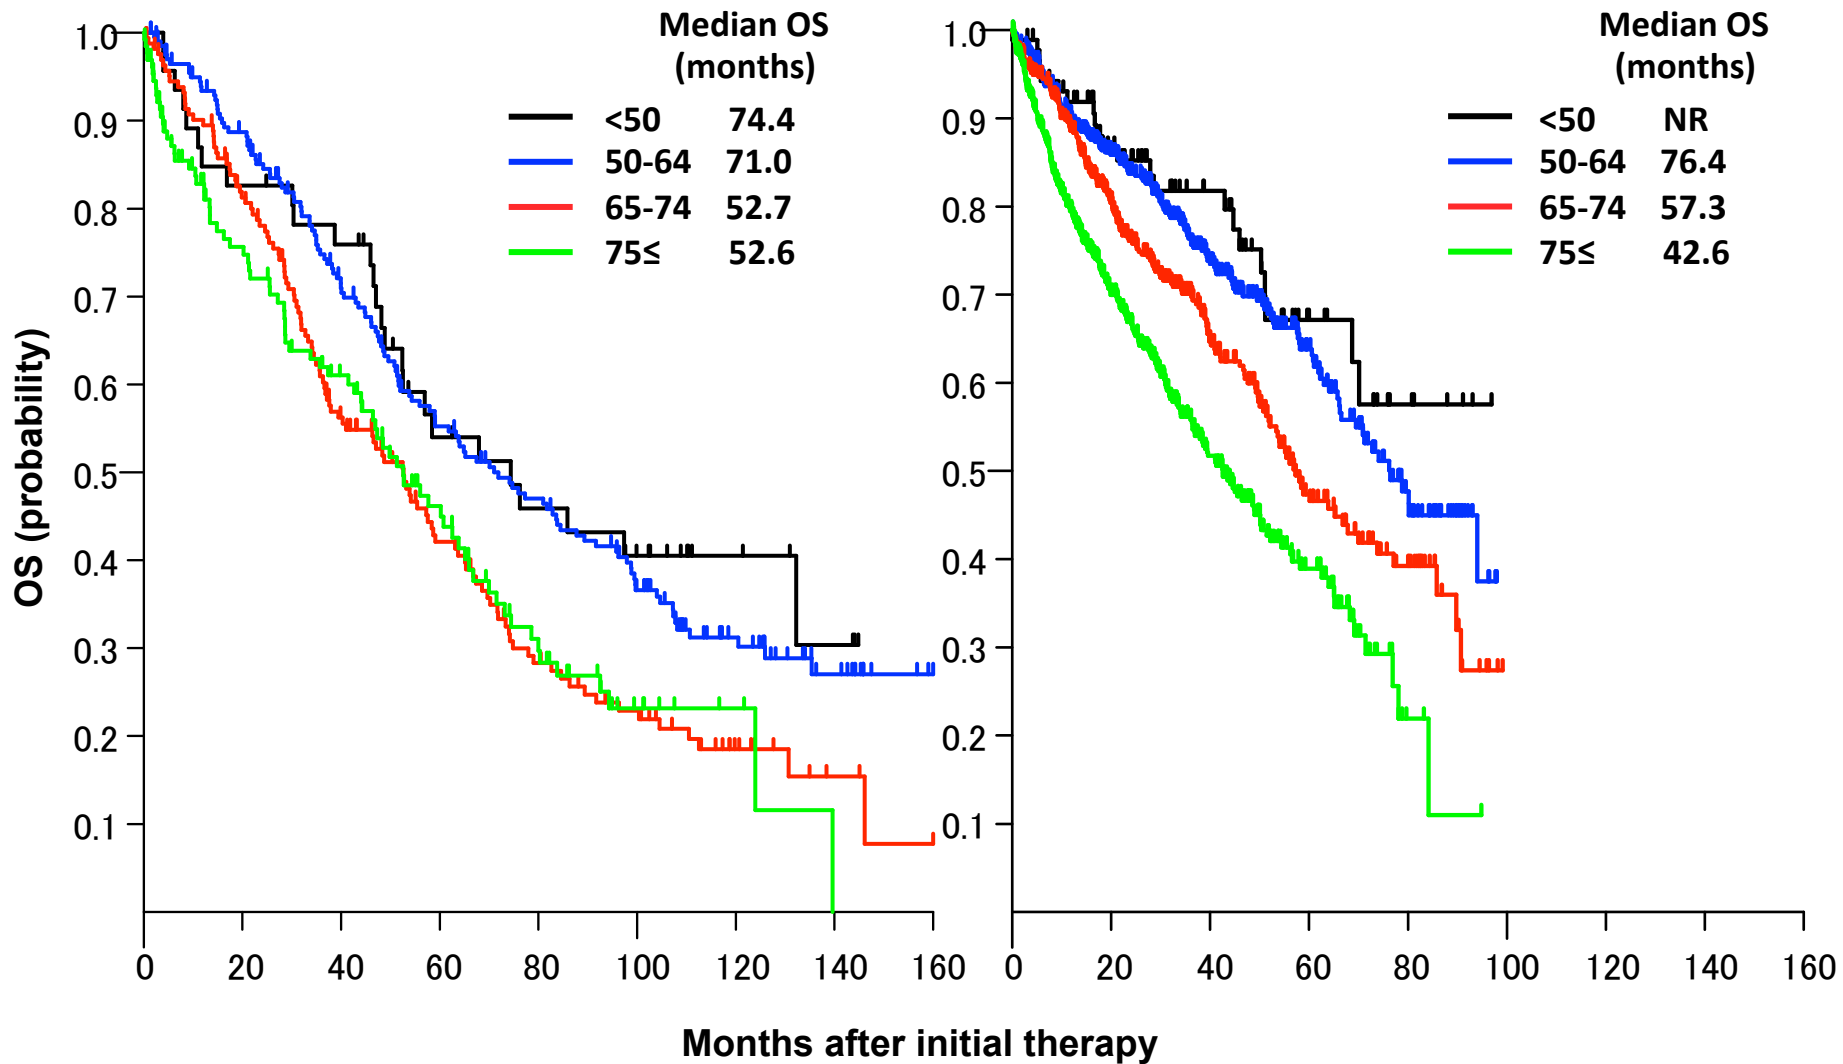

# Supplementary Figure 1

**b**

**1990-2000**

**2001-2012**

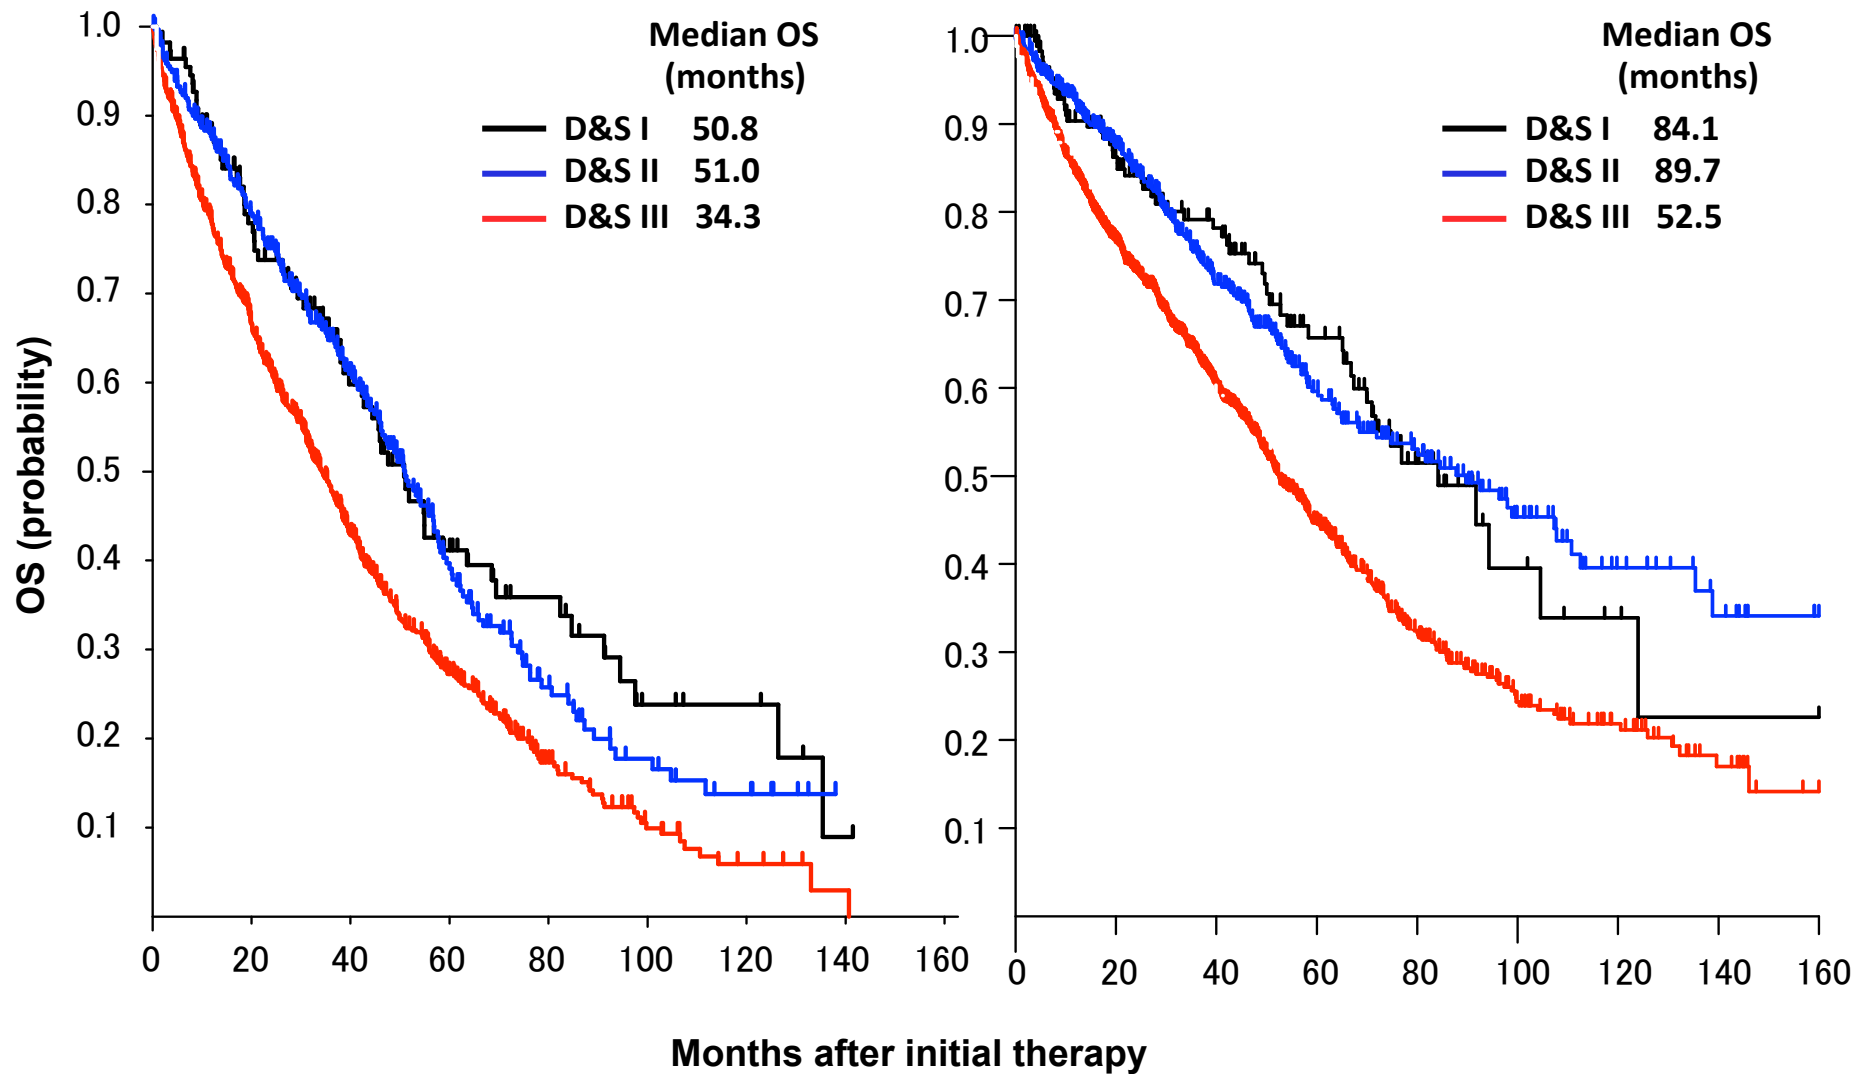

# Supplementary Figure 1

**c**

**1990-2000**

**2001-2012**

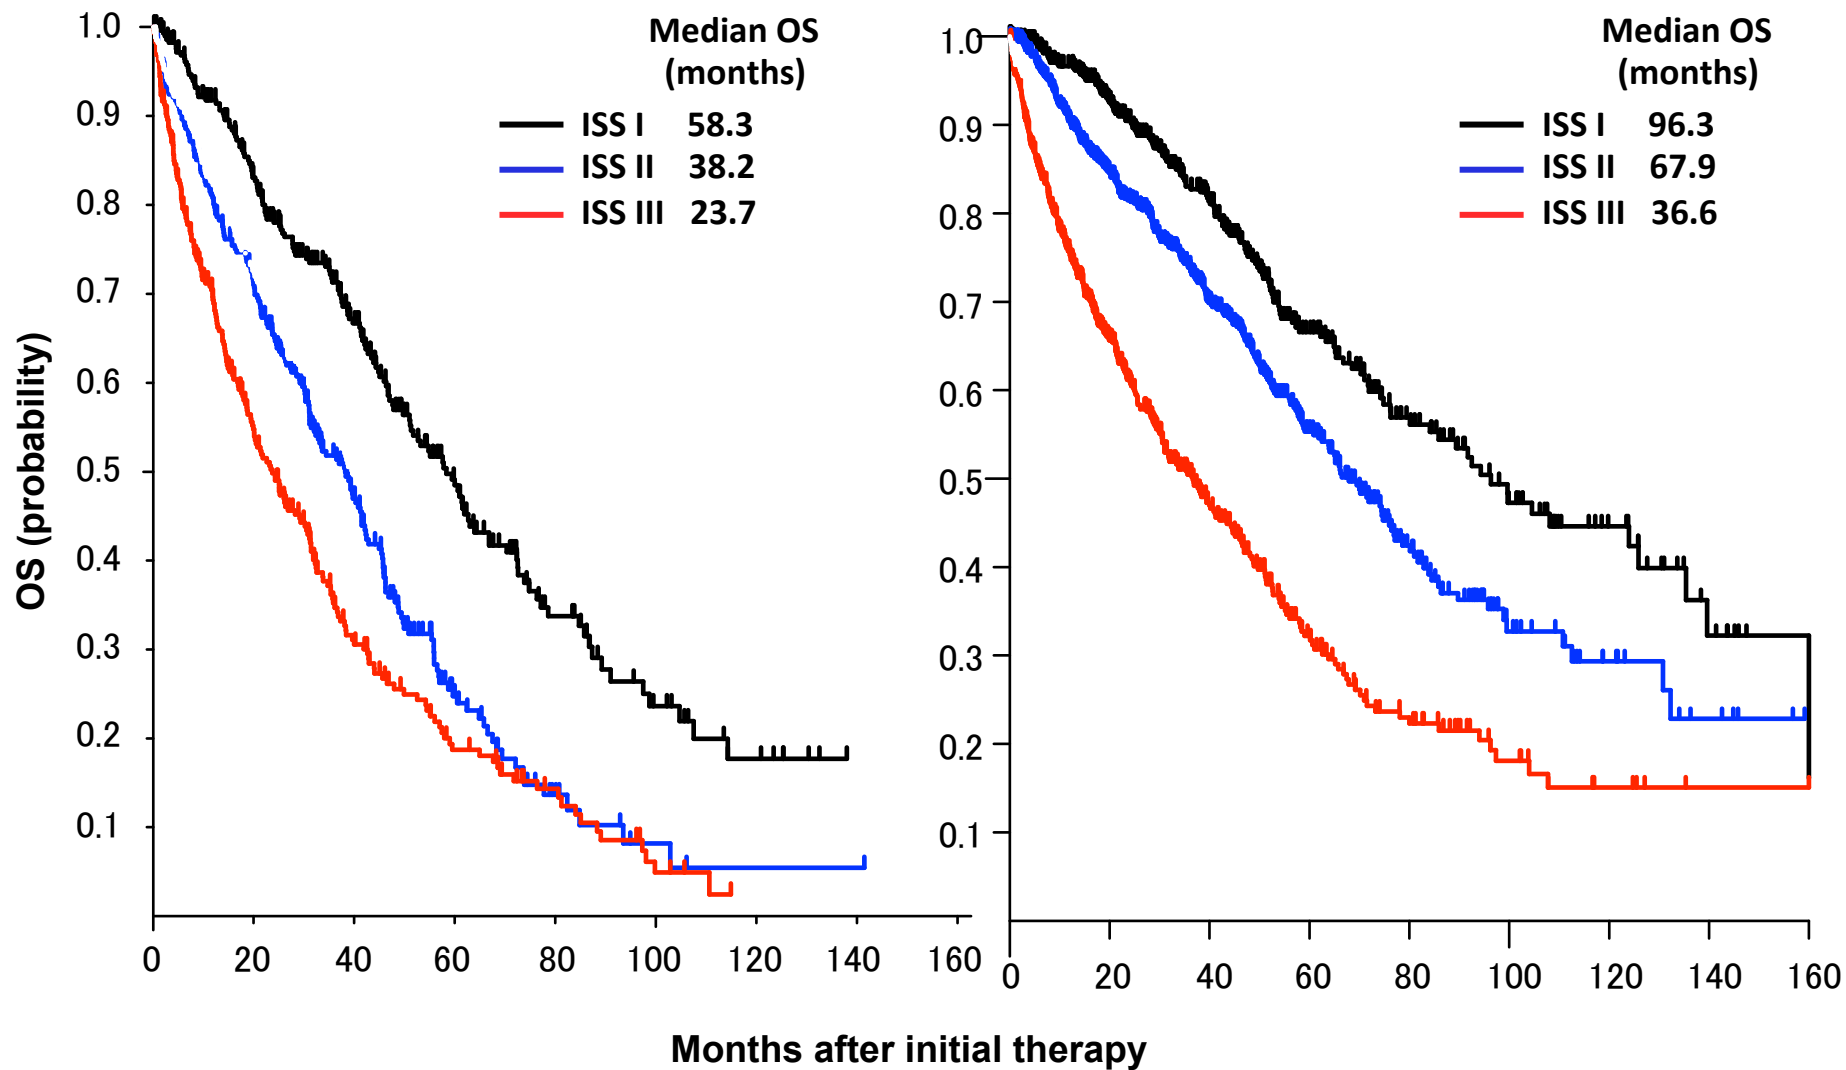

# Supplementary Figure 1

**d**

**1990-2000**

**2001-2012**

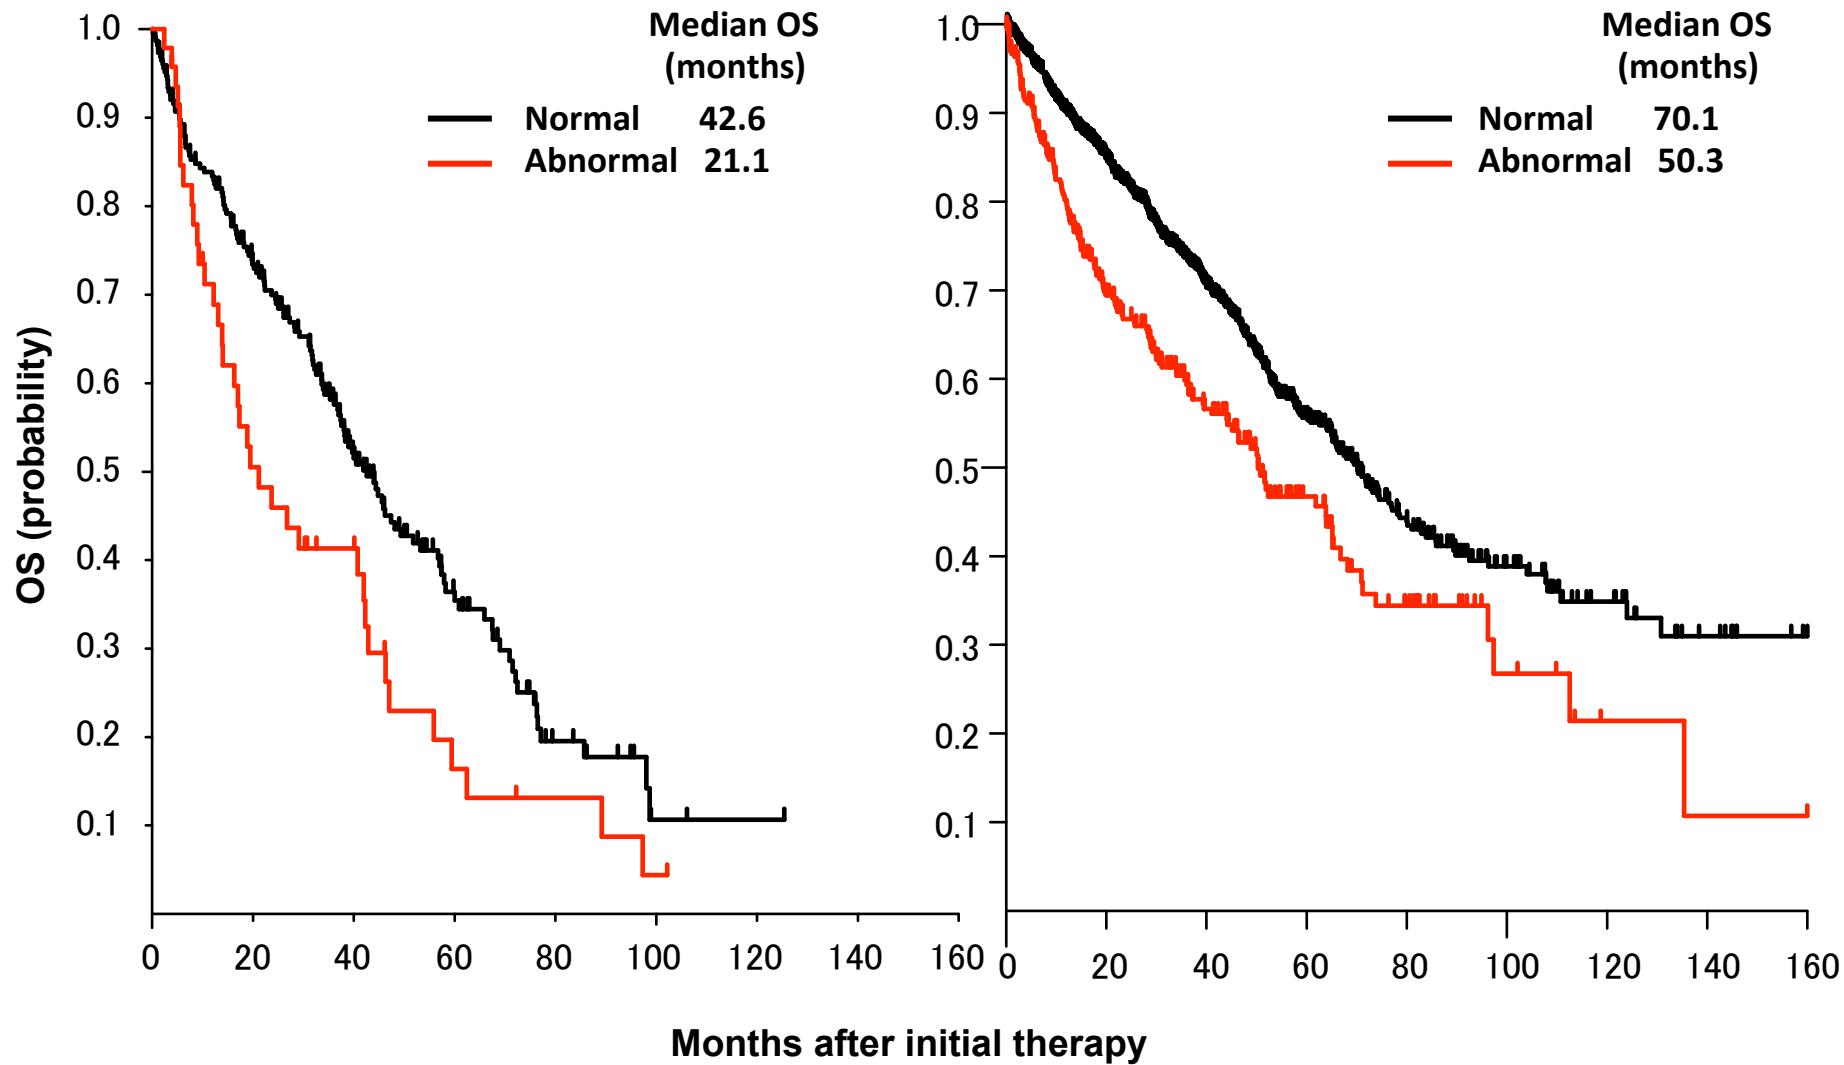

Supplementary Figure 1

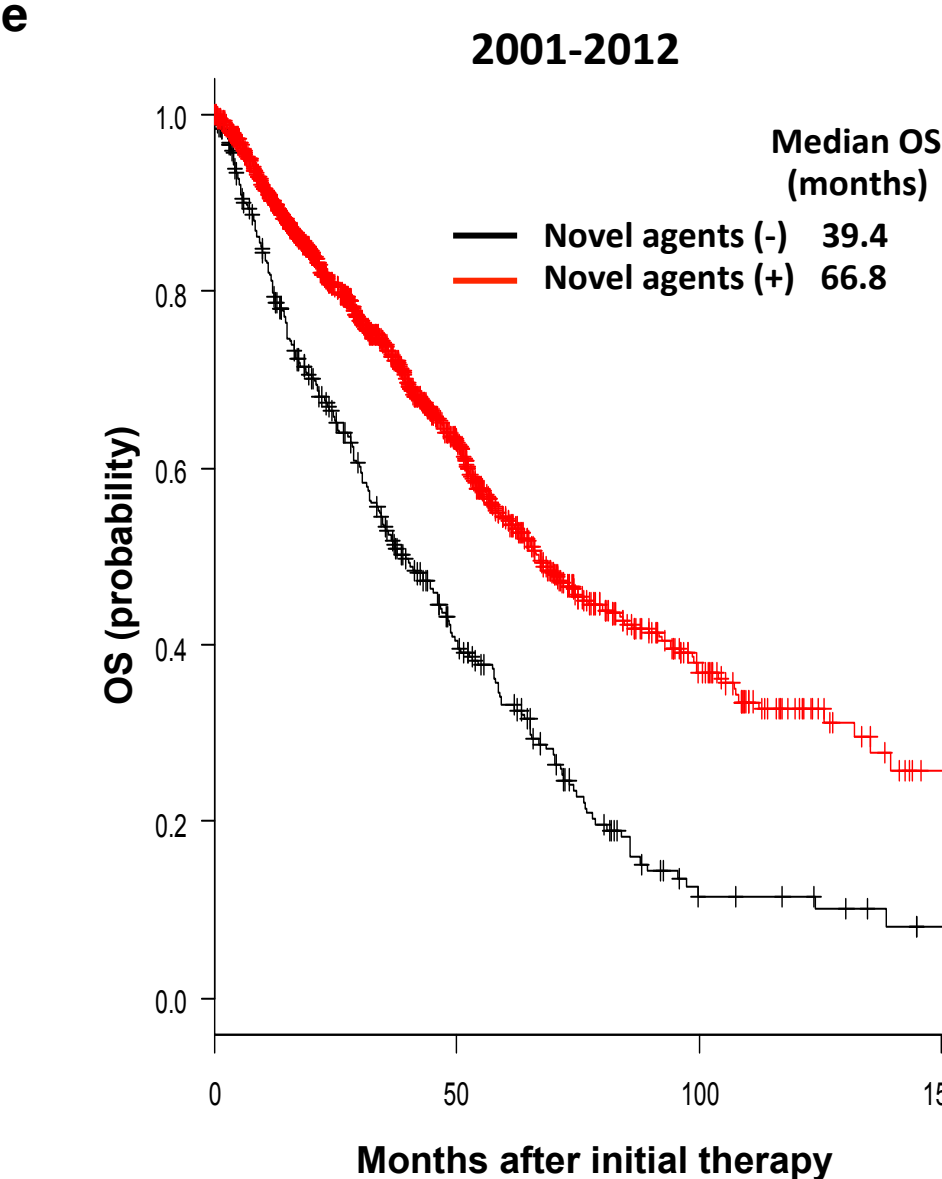

Supplement: bcj201579x2.pdf [file bcj201579x2.pdf]
